## An integrated, modular approach to data science education in the life sciences

Kimberly A Dill-McFarland<sup>1,2,3</sup>, Stephan G König<sup>1,2</sup>, Florent Mazel<sup>1,2,4</sup>, David Oliver<sup>1</sup>, Lisa M McEwen<sup>1,2,5</sup>, Kris Y Hong<sup>1,2</sup>, Steven J Hallam<sup>1,2,6,7,8\*</sup>,

**1** Department of Microbiology and Immunology, University of British Columbia, Vancouver, British Columbia, Canada

**2** ECOSCOPE, University of British Columbia, Vancouver, British Columbia, Canada

**3** Current address: Division of Allergy and Infectious Diseases, Department of Medicine, University of Washington, Seattle, WA, USA

**4** Department of Botany and Biodiversity Centre, University of British Columbia, Vancouver, British Columbia, Canada

**5** School of Health Information Science, Faculty of Human and Social Development, University of Victoria, Victoria, British Columbia, Canada

**6** Graduate Program in Bioinformatics, University of British Columbia, Genome Sciences Centre, Vancouver, British Columbia, Canada

**7** Genome Science and Technology Program, University of British Columbia, 2329 West Mall, Vancouver, British Columbia, Canada

**8** Life Sciences Institute, University of British Columbia, Vancouver, British Columbia, Canada

\* shallam@mail.ubc.ca

### Abstract

We live in an increasingly data-driven world, where high-throughput sequencing and mass spectrometry platforms are transforming biology into an information science. This has shifted major challenges in biological research from data generation and processing to interpretation and knowledge translation. However, post-secondary training in

bioinformatics, or more generally data science for life scientists, lags behind current demand. In particular, development of accessible, undergraduate data science curricula has potential to improve research and learning outcomes and better prepare students in the life sciences to thrive in public and private sector careers. Here, we describe the Experiential Data science for Undergraduate Cross-Disciplinary Education (EDUCE) initiative, which aims to progressively build data science competency across several years of integrated practice. Through EDUCE, students complete data science modules integrated into required and elective courses augmented with coordinated co-curricular activities. The EDUCE initiative draws on a community of practice consisting of teaching assistants, postdocs, instructors and research faculty from multiple disciplines to overcome several reported barriers to data science for life scientists, including instructor capacity, student prior knowledge, and relevance to discipline-specific problems. Preliminary survey results indicate that even a single module improves student self-reported interest and/or experience in bioinformatics and computer science. Thus, EDUCE provides a flexible and extensible active learning framework for integration of data science curriculum into undergraduate courses and programs across the life sciences.

**Availability and implementation:** The EDUCE teaching and learning framework is accessible at [educue-ubc.github.io](http://educue-ubc.github.io)

## Introduction

We live in an increasingly data-driven world, where high-throughput sequencing and mass spectrometry platforms have generated a veritable tsunami of multi-omic information (*e.g.* DNA, RNA, protein, and metabolite) spanning multiple levels of biological organization [1, 2]. For example, over 31 terabases of genomic sequence information are created on average per second, and rates are expected to continue to increase with continued technological improvement across the life sciences [3]. In this light, major challenges in the life sciences are shifting away from data generation and processing to interpretation and knowledge translation resulting in a need for increased training in bioinformatics or more generally, data science.

Despite calls to action as early as 20 years ago [4], there remains a sustained, unmet

need for bioinformatics training in the life sciences [5]. In 2015, Horton and Hardin 12  
described prevalent challenges and opportunities of this mandate in a special issue of 13  
the American Statistician focused on teaching statistics students how to "Think with 14  
data" [6]. Beyond reforming curriculum in mathematics and statistics, a meta-analysis 15  
of surveys from organizations such as the Global Organisation for Bioinformatics 16  
Learning, Education and Training (GOBLET), the European life-sciences Infrastructure 17  
for Biological Information (ELIXIR), the U.S. National Science Foundation (NSF), and 18  
the Australia Bioinformatics Resource (EMBL-ABR) found the desire for training to be 19  
widespread both in terms of geography and career level [5]. While a number of training 20  
formats were applicable, the most common ask for undergraduate students was 21  
integrated data science training within current degree programs [5]. Such an integrated 22  
program would ensure that all students develop core competency needed for continued 23  
studies and career development. 24

In order to meet this clear and present need for data science education in the life 25  
sciences, the University of British Columbia (UBC) has launched a number of initiatives 26  
in recent years. These include the Master of Data Science program as well as several 27  
specialized undergraduate majors like biotechnology (BIOT) and combined computer 28  
science-life science programs. While these programs provide a subset of students with 29  
in-depth training, they are inherently self-selecting and limit integrated and inclusive 30  
development of core competency across the faculty of science [7]. Given that data 31  
science training is necessary for life science graduates and specialized degree programs 32  
do not attract all students, we posit that such training needs to be incorporated into the 33  
fabric of undergraduate coursework such that students are able to progressively develop 34  
confidence and skills in an active learning process [8,9]. 35

With this teaching and learning paradigm in mind, the Experiential Data science for 36  
Undergraduate Cross-Disciplinary Education (EDUCE) initiative was launched in Fall 37  
2017. The following provides an in-depth description of the EDUCE framework as well 38  
as preliminary findings from EDUCE modules implemented in Microbiology and 39  
Immunology (MICB) courses at UBC. 40

## Experiential Data science for Undergraduate

### Cross-Disciplinary Education (EDUCE)

EDUCE seeks to develop an extensible, progressive, cross-disciplinary and collaborative framework to equip undergraduate students in the life sciences with core competency in data science. EDUCE curriculum provides students with the most commonly needed data science skills as defined by recent surveys [5]. Focal learning objectives of the EDUCE teaching and learning framework ask students to learn to:

- Recognize and define uses of data science
- Explore and manipulate data
- Visualize data in tables and figures
- Apply and interpret statistical tests

Sub-objectives are defined using discipline-specific data sets, questions, and software. The combined set of learning objectives are achieved through 1) a modular curriculum plugged into existing courses, 2) coordinated co-curricular activities, and 3) a cross-disciplinary community of practice that brings together teaching teams across multiple training levels. The resulting teaching and learning framework allows students to progressively develop core competency over several years of integrated practice.

### Modular curriculum

The EDUCE framework is modular, providing for flexible integration of data science curriculum within a single course or a series of interconnected courses. Modules are self-contained, adjustable bundles of learning materials that can be delivered as stand alone classes, recurring instances e.g. 'data science Fridays', or integrated consecutively in support of capstone projects.

Because EDUCE is modular, it overcomes several of the largest barriers to data science education in the life sciences including instructor capacity, student prior knowledge, and relevance to discipline-specific problems. [10]. Specifically, modules are developed and delivered using a community of practice model that empowers instruction across different training levels and disciplines [11]. Teaching assistants (TAs), postdocs,

instructors and research faculty co-create learning materials and work together across  
courses to implement EDUCE modules resulting in a zone of proximal development for  
curriculum development [12]. EDUCE modules assume no prior knowledge as they  
incorporate all necessary introductory and background material, including materials  
unique to that module and review activities from previous modules. Finally, module  
integration circumvents traditional course creation, *i.e.* new course codes, thus allowing  
quicker, more broadly accessible curriculum deployment within the university ecosystem.

**Fig 1. EDUCE module overview.** Each EDUCE module consists of introduction, practice, application, and communication. Early, introductory modules are focused on introduction and practice while later, more advanced modules challenge students to apply their developing data science skills to higher dimensional data with emphasis on visualization, interpretation and communication.

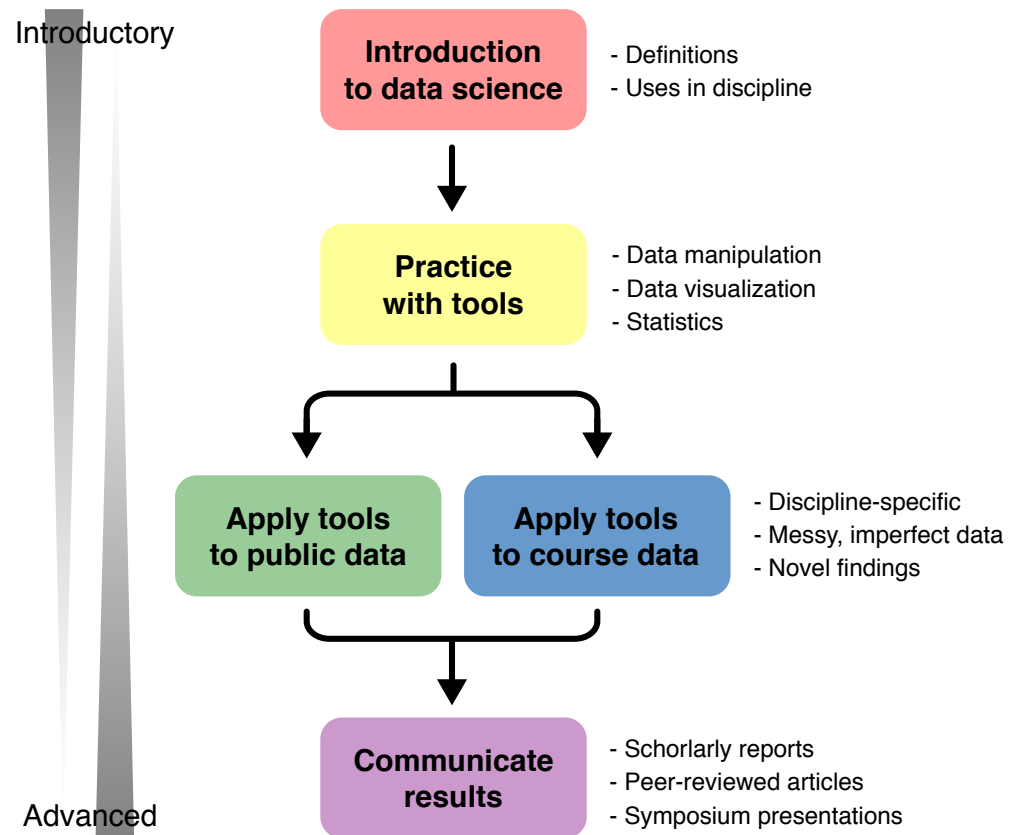

In addition, modular instruction allows for more timely and direct linkages to  
discipline-specific content than traditional course structures. For example, students  
cover the global impacts, thermodynamics, etc. of the nitrogen cycle in their regular  
course content and then immediately enter an EDUCE module in which they quantify

and plot nitrogen species in the ocean using R [13]. This aids student learning in both the discipline and data science as students are able to reference prior knowledge while reflecting on the meaning and application of a nascent skill. Thus, modules leverage student interest in their chosen area of study and maximize the relevancy of data science content used in the learning process.

An EDUCE module consists of all materials related to a set of learning objectives and includes 1) introduction, 2) practice, 3) application, and 4) communication (Fig 1). As students progress from introductory to advanced modules across several courses, the teaching and learning focus transitions from introduction and practice to application and communication. Thus, while each module contains all four aspects, later modules build on prior knowledge to both reinforce key concepts and stimulate students to apply developing data science skills to higher dimensional problems with emphasis on visualization, interpretation and communication. This builds progressive competency in data science over several years of instruction without the need for additional course requirements.

Modules vary in size from a single activity to capstone projects, and they can include a range of materials bundled together based on learning objectives, available class time, and instructor needs. Examples of specific MICB modules are shown in detail below and additional examples can be found in the "Course Compiler" app on the EDUCE organizational website ([educer-ubc.github.io/compiler.html](https://educer-ubc.github.io/compiler.html)).

- Lecture slides
- Notes / handouts
- In-class tutorials
- At-home tutorials
- Screen capture videos
- Individual assignments
- Team projects

## Example modules in Microbiology

EDUCE modules have been integrated into seven third and fourth year MICB courses at UBC selected based on internal curriculum review and instructor interest (Table 1). These courses include lectures, wet labs, and dry labs (*i.e.* tutorials).

**Table 1. EDUCE courses in microbiology (MICB)**

| MICB code | Name                                               | L | W | D | Hrs/wk | EDUCE hrs |
|-----------|----------------------------------------------------|---|---|---|--------|-----------|
| 301       | Microbial ecophysiology                            | X |   |   | 3      | 5         |
| 322       | Molecular microbiology laboratory                  | X | X |   | 6      | 3         |
| 323       | Molecular immunology and virology laboratory       | X | X |   | 7      | 3         |
| 405       | Bioinformatics                                     | X |   | X | 4      | 17        |
| 425       | Microbial ecological genomics                      | X |   |   | 3      | 17        |
| 421, 447  | Experimental microbiology/molecular biology (CURE) | X | X |   | 7      | 2+        |

L: Lecture, W: Wet lab, D: Dry lab, CURE: Course-based undergraduate research experience

EDUCE content varies in each course and builds from the third (300+) to fourth-year (400+) (Fig 2). Ideally, students enter the program in MICB 301 where they master basic R/RStudio scripting to manipulate data, create figures, and perform *t*-tests. Then, students acquire additional practice in R/RStudio in 300-level labs (MICB 322 and 323) where they employ specialized R packages to manipulate and plot data generated in the course. For example, MICB 322 uses the Sushi package [16] to visualize transposon insertions in the *Caulobacter* mutant library created by students in the course. Next, students progress to elective 400-level courses including MICB 405 and 425, and course-based undergraduate research experiences (CUREs) including MICB 421 and 447. In the elective courses, EDUCE modules are built into the curriculum and include capstone projects using published but under-explored metagenomic and metatranscriptomic data sets [17]. In contrast, CUREs involve student-led research projects that generate novel data. Thus, EDUCE serves as a consultation resource to help students with R/RStudio packages, Unix tools, or statistical methods as required for their individual projects. All EDUCE elective courses offer the opportunity for students to communicate their scientific findings through publication in the Undergraduate Journal of Microbiology and Immunology (UJEMI, [jemi.microbiology.ubc.ca](http://jemi.microbiology.ubc.ca)) and/or presentation at the MICB Undergraduate Research Symposium (URS, [jemi.microbiology.ubc.ca/UndergraduateResearchSymposium](http://jemi.microbiology.ubc.ca/UndergraduateResearchSymposium)).

While the above is an ideal module progression, the EDUCE framework is

**Fig 2. EDUCE curriculum in microbiology.** Students enter the program in MICB 301 or equivalent coursework at the British Columbia Institute of Technology (BCIT). Some students take additional 300-level courses, MICB 322 and 323. Then, all students progress to one or more elective 400-level courses with prescribed outlets for communication of results. MICB: microbiology

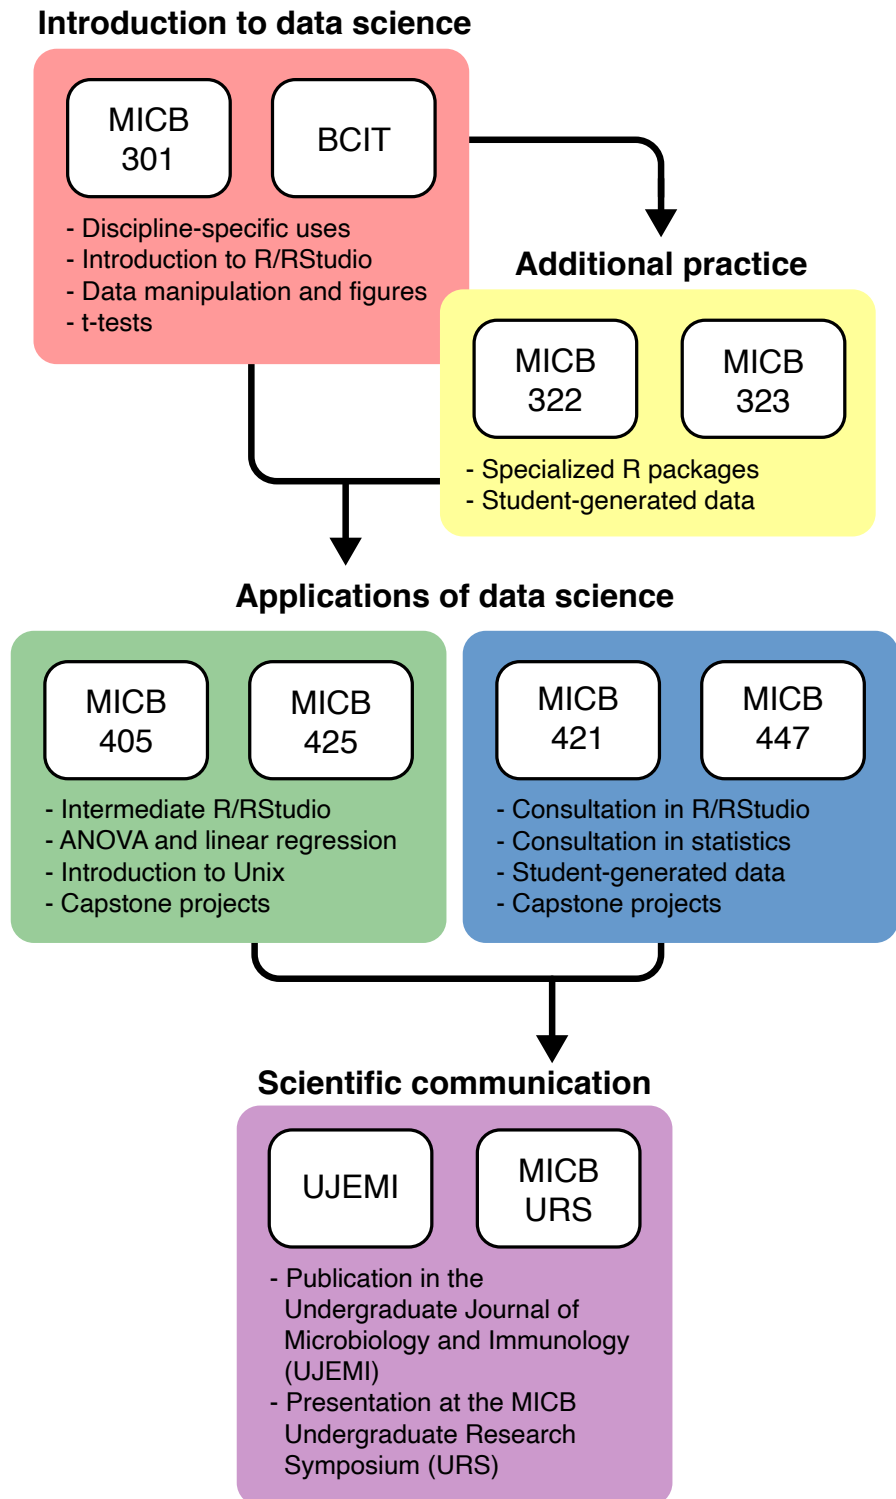



intentionally adjustable. This is necessary, because MICB prerequisite structure and major requirements do not resolve a linear progression for all students. Microbiology Honours (MBIM) and MICB degrees require the majority of EDUCE courses, while combined majors require a subset of EDUCE courses with little overlap between elective options. Specifically, the MICB/MBIM and Computer Science (+CPSC) or Earth, Ocean, and Atmospheric Sciences (+EOAS) majors require the first EDUCE course (MICB 301) but different 400-level elective courses (MICB 405 and 425, respectively). MICB/MBIM + EOAS also requires an additional 300-level EDUCE 'practice' course. The Biotechnology (+BIOT) degree, on the other hand, is a joint program wherein students spend their second and third years at BCIT. Thus, +BIOT does not require any 300-level EDUCE courses. In addition, many students choose to take additional 400-level elective courses beyond those required by their major (Table 2).

**Table 2. EDUCE course requirements for microbiology majors**

| MICB code      | Undergraduate major |       |       |       |
|----------------|---------------------|-------|-------|-------|
|                | MICB/MBIM           | +CPSC | +EOAS | +BIOT |
| <b>301</b>     | R                   | R     | R     | S     |
| <b>322</b>     | R                   | S     | R     | O     |
| <b>323</b>     | R                   | S     | O     | O     |
| <b>405</b>     | O                   | R     | S     | R     |
| <b>425</b>     | O                   | O     | R     | S     |
| <b>421/447</b> | R                   | O     | O     | S     |

R: Required, S: Suggested, O: Optional. MICB: Microbiology, MBIM: Microbiology Honours, CPSC: Computer Science, EOAS: Earth, Ocean, and Atmospheric Sciences, BIOT: Biotechnology.

These course modules incorporate the four focal learning objectives and form the basis of the EDUCE teaching and learning framework. While all MICB students obtain some level of data science competency through EDUCE modules within required courses, not all students are exposed equally due to course dependency relationships or specialized program requirements. To help overcome this variation, a persistent co-curricular layer was developed that is coordinated in time with EDUCE module deployment.

## Co-curricular activities

EDUCE co-curricular activities reinforce and expand on course modules by providing undergraduate students with multiple data science learning opportunities outside of the classroom setting. Similar to course modules, co-curricular activities are flexible and integrated to provide students with progressive levels of instruction from introductory to advanced (Fig 1). Such activities include workshops, hackathons, and directed studies that incorporate one or more focal learning objectives and meet the following criteria.

They must first and foremost be accessible in terms of cost, content, and schedule. Specifically, undergraduate students are often unable to pay the high costs of data "boot camps" [18] and resist outside training opportunities due to motivational barriers or limited time [19]. Secondly, EDUCE co-curricular activities directly reiterate and build on learning objectives from related course modules. This feature is intended to improve student learning by referencing prior knowledge [14] and imparting discipline-specific meaning to developing skills [15]. This is particularly important for short-term training opportunities as recent research suggests that fully stand-alone programs, such as "boot camps", do not promote long-term skill development even at the graduate level [20,21]. Finally, co-curricular activities invoke the same or similar data sets and packages as course modules.

Course modules are coordinated in time with co-curricular activities to prime student participation. For example, in the Fall term introductory R workshops are offered at the same time that students are introduced to R scripting in MICB301 and provide a refresher for students in MICB405 prior to learning more advanced functions and faceted data visualization. While integration with classroom module requires that co-curricular activities are discipline-specific this does not necessarily exclude other participants. For example, an R [13] workshop using oceanic oxygen data may be designed for life or Earth science students but is no less accessible to other disciplines than the commonly used R "cars" data [22]. While current EDUCE workshops focus on applying data science skills in ecology and microbiology, thematic workshop can be readily developed to focus on discipline-specific data sets or software applications.

EDUCE co-curricular activities fulfill a number of roles. Workshops provide a relaxed and open environment in which to practice current course modules or review

previous ones and allow students opportunities to explore learning modules from courses that conflict with their registered schedules. Workshops also provide the teaching team an opportunity to benchmark new curriculum prior to module integration into classroom settings. Other co-curricular activities such as hackathons provide opportunities for students to work in a more social team setting to solve interesting problems with real world implications while directed studies provide students with the opportunity to use their data science skills to answer specific research questions. During workshops and hackathons, substantial time is dedicated to promoting scaffolding between participants across different training levels.

### **Example co-curricular workshops in Microbiology**

The EDUCE program at UBC has partnered with the Ecosystem Services, Commercialization Platforms and Entrepreneurship (ECOSCOPE, [ecoscope.ubc.ca](http://ecoscope.ubc.ca)) training program and the Applied Statistics and Data Science Group (ASDa, [asda.stat.ubc.ca](http://asda.stat.ubc.ca)) to deliver data science workshops accessible to participants across different training levels from undergraduate students to industry professionals. The current workshop portfolio ([github.com/EDUCE-UBC/workshops\\_access](https://github.com/EDUCE-UBC/workshops_access)) consists of 32 hours of content in R [13] including the same oceanic geochemical data set [23] used in most EDUCE course modules. These workshops incorporate the four focal learning objectives and include:

- Introduction to R
- The R tidyverse
- Reproducible research in R and Git
- Intermediate R programming
- Statistical models in R
- Phylogenetics and microbiomes in R

Introduction to R is a short refresher of the MICB 301 module or an introduction to the workshop series for participants not enrolled in EDUCE courses. The R tidyverse closely follows its respective module in MICB 405 and 425 (Fig 1) and thus, can be used

as a refresher or additional practice. The remaining workshops have some overlap with course modules (like ANOVA in Statistical models in R and MICB 405) but mainly build on the fourth year modules to challenge students to continue developing their data science skills. In 2020, two advanced workshops were added including *Introduction to programming and plotting in Python* and *Visualization of metagenomic and metatranscriptomic data*.

Importantly, ECOSCOPE sponsorship allows undergraduates to take any workshop for 10 CAD as compared to regular registration fees of 100 CAD or more. This, along with careful scheduling to 1) align workshop content with undergraduate course modules and to 2) accommodate the most common undergraduate schedules in MICB, facilitates increased undergraduate participation. Workshops are actively advertised in undergraduate MICB courses, the ECOSCOPE website and multiple campus list serves. If scheduling conflicts prevent a significant number of undergraduates from participating, additional workshop sessions are planned on an ad hoc basis. While current workshops run on a subsidized cost recovery basis this model can only be maintained with sustained institutional support that ideally would enable registered students to participate for free.

## Community of practice

Data science is an inherently cross-disciplinary field traditionally comprised of statistics, mathematics, and computer science. EDUCE builds on this tradition through a cross-disciplinary community of practice including traditional and less conventional fields. While EDUCE is coordinated by a research faculty member and postdoctoral teaching and learning fellow (TLF) appointed through MICB, the teaching team spans 10 departments across three faculties (Fig 3). For example, statistics consults on module development, mathematics provides resource support, and teaching assistants (TAs) have been recruited from the Faculties of Science, Applied Science, and Medicine. The community consists of multiple training levels including undergraduate and graduate students, postdoctoral fellows, instructors and research faculty. Overall, the EDUCE teaching team brings together expertise from across the university to provide relevant curriculum grounded in both current data science best practices and scholarship of

education leadership.

240

**Fig 3. EDUCE team members at UBC.** The EDUCE initiative is led by MICB in the Faculty of Science. However, TAs, consultants, collaborators, and other support come from across the campus community and include 10 departments from 3 Faculties (Science, Applied Science and Medicine). Team members include multiple training levels that work together to develop and deploy content in both courses and co-curricular activities.

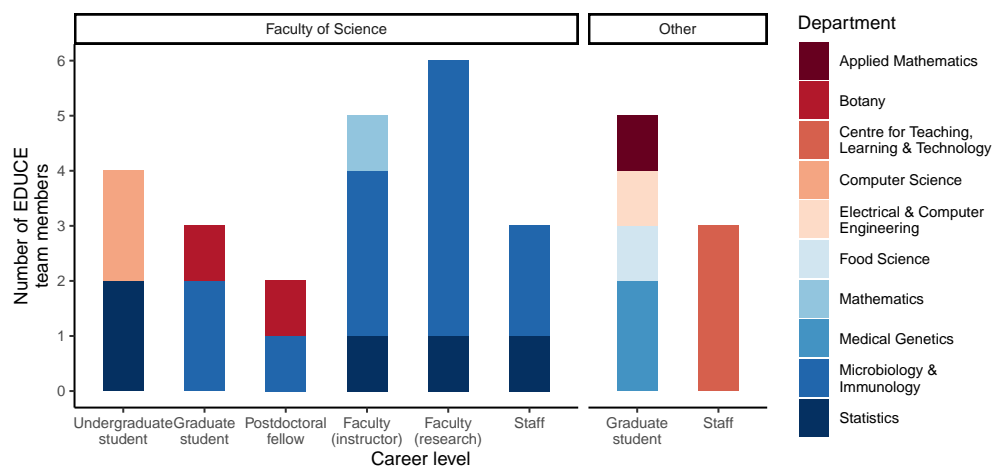

The EDUCE community of practice reflects widespread changes in teaching in MICB. A growing number of MICB courses (24% in 2018/19) are taught by a team of faculty often including both tenure-track researchers and instructors. This team teaching brings additional expertise, styles, and perspectives into the classroom [24, 25] and encourages collaboration and community [25]. In addition to faculty, EDUCE TAs contribute to team teaching. Unlike traditional appointments, EDUCE TAs are not assigned to a specific course nor do they always come from the same department. Instead, EDUCE TAs are recruited from across the campus community and participate at every level, from curriculum development to office hours and instruction. This provides undergraduate students in EDUCE courses with diverse resources, viewpoints, and role models as they progress through modules and co-curricular activities. At the same time, EDUCE TAs gain hands-on teaching experience and evaluation to build their individual teaching portfolios.

241

242

243

244

245

246

247

248

249

250

251

252

253

## Preliminary outcomes of EDUCE

EDUCE launched at UBC in Fall Term 1 of the 2017/18 academic year. At present, approximately 475 (redundant) students are exposed to EDUCE modules through 45 total classroom hours in five MICB courses per year. Over the first two years, co-curricular workshops were taken by 77 EDUCE students, which resulted in increasing undergraduate participation from 0% (2016/17, prior to partnership with EDUCE) to 8.8% (2017/18) to 23% (2018/19) of total registrants. Undergraduate participants in workshops appears to be stabilizing around 20% in 2019/20.

**Fig 4. Student interest and experience in data science.** Student responses from matched pre- and post-surveys in MICB 301 indicating self-reported interest (N = 143 - 146) and experience (N = 136 - 143) in data science areas including bioinformatics and computer science. Numerical responses from 2018/19 were converted to categorical groups from 2017/18 as none (0), low (1-3), medium (4-7), and high (8-10). Arrows and p-values indicate significant response changes by Monte Carlo symmetry tests for paired contingency tables.

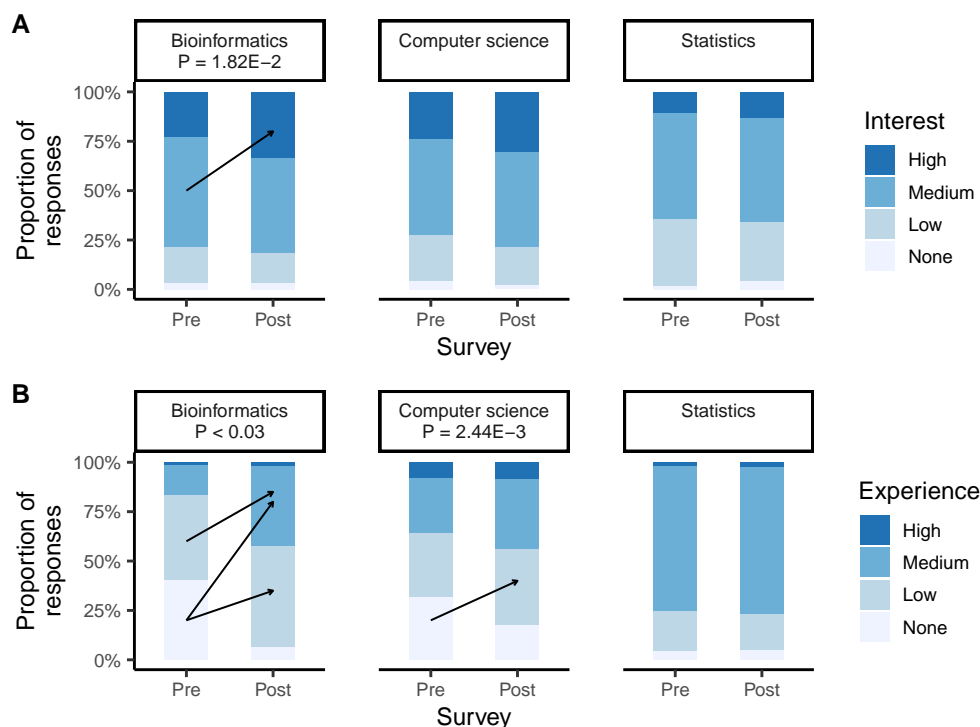

Evaluation of EDUCE is on-going and includes student surveys with Research Ethics Board Approval (H17-02416) at the start (pre) and end (post) of courses (Text S1) as well as at the end of workshops. Courses with <5 EDUCE hours (Table 1) were

excluded to avoid redundant surveying of students. For example, >95% of students in MICB 322 concurrently take MICB 301. At present, 439 pre-course responses and 400 post-course responses have been collected with 91 students indicating willingness to complete post-graduation surveys or focus groups. An additional 44 responses have been collected from co-curricular workshops.

Preliminary analysis of the first EDUCE course, MICB 301, from 2017-18 revealed that student self-reported interest in 'bioinformatics' increased with a significant transition from medium to high interest (Monte Carlo FDR  $P = 1.82E-2$ , Fig 4). Similarly, student self-reported experience in 'bioinformatics' significantly increased from none to low (FDR  $P = 1.84E-7$ ) or medium (FDR  $P = 2.74E-5$ ) as well as from low to medium (FDR  $P = 2.69E-2$ ). This is relevant to attracting more students to fourth year elective courses implementing EDUCE modules including MICB405 and MICB425. In contrast, self-reported interest in 'computer science' remained constant but showed significant gains in experience from none to low (FDR  $P = 2.44E-3$ ), and 'statistics' had no significant changes in either interest or experience. Thus, it appears that even minimal exposure to data science in disciplinary coursework (5 hours, (Table 1)) may impact student interest and confidence in some data science areas. More importantly, at least one case was observed in which a group of students successfully transferred and implemented these skills for their undergraduate research project resulting in a UJEMI+ publication (<https://jemi.microbiology.ubc.ca/node/188>). Full analysis details are available at [https://github.com/EDUCE-UBC/2020\\_PLOS](https://github.com/EDUCE-UBC/2020_PLOS).

## Conclusion

The EDUCE initiative at UBC was launched in Fall 2017 in response to a clear and present need to expand data science education in the life sciences. The initiative seeks to develop an extensible, progressive, cross-disciplinary and collaborative framework to equip undergraduate students in the life sciences with basic competency in data science. EDUCE learning objectives are achieved through 1) a modular curriculum plugged into existing courses, 2) coordinated co-curricular activities, and 3) a cross-disciplinary community of practice that brings together teaching teams across multiple training levels. The resulting framework allows students to develop progressive data science

competency over several years of integrated practice. Initial implementation of EDUCE  
learning modules and co-curricular activities is focused on ecology and microbiology but  
can be readily extended to other data sets and discipline-specific software in the life  
sciences. All EDUCE teaching and learning materials are available on GitHub with the  
intention of developing an open source community of practice that extends beyond UBC.

While course modules are designed to be extensible, some modification is required  
prior to implementation in a new course to accommodate individual teaching style,  
course schedule, and student prior knowledge. This process is made easier through  
collaboration across the EDUCE community of practice. However, as with any new  
curriculum, instructor preparation time remains a barrier to implementation of EDUCE  
modules in some courses. In the future, collaborative platform like GitHub classroom  
could facilitate collaboration and material exchange between instructors and strengthen  
the community of practice. Another on-going challenge is student's prior knowledge.  
Due to the non-linear nature of MICB degree requirements at UBC, some students  
come into an intermediate EDUCE courses without prior EDUCE experience while  
others repeat EDUCE content in multiple courses. To overcome this, supplementary  
exercises are being developed for students entering EDUCE courses in fourth-year.  
Although preliminary results indicate that EDUCE is having positive impacts on  
student interest and learning in data science, further analyses of collected survey data  
are needed to determine if 1) these perceived changes translate into long-term skill  
development [20] and if 2) EDUCE curriculum is truly causative of these outcomes.

Despite the need for continued data collection to measure EDUCE impacts, the  
framework provides a viable approach to data science education in the life sciences that  
is both flexible and scalable across in person and remote learning platforms. As with  
any other ability, students need the time and scaffolding to learn data science tools, and  
the relevant education should not be confined to a single course. The EDUCE  
community of practice works to transcend siloed educational norms resulting in a zone  
of proximal development that supports both student and instructor achievement. Given  
that data science competency also referred to as data literacy is increasingly recognized  
as a critical but limiting ability in the modern workforce, institutions and granting  
agencies are encouraged to think about resource allocation beyond the silos of individual  
courses and departments in order to sustain interdisciplinary teaching and learning



frameworks like EDUCE. 327

## Acknowledgments 328

The authors wish to thank faculty and instructors for access to courses and support 329  
during module integration, including Marcia Graves, Martin Hirst, William Mohn, Sean 330  
Crowe, and Jennifer Sibley. We also thank our statistics guru Gaby Cohen Freue, 331  
members of the AsDA workshop team including Carolyn Taylor and Biljana Jonoska 332  
Stojkova, and teaching assistants for their effort and support throughout the program, 333  
including Julia Beni, Jonah Lin, Yue Liu, Nolan Shelley, and David Yin. Special thanks 334  
to Zaira Petruf, Kevin Lin, Aria Hahn and Jennifer Bonderoff for getting ECOSCOPE 335  
and EDUCE activities organized and off the ground, Sara Harris, Gulnur Birol and 336  
Ashley Welsh in the Skylight Science Centre for Learning and Teaching and Jeff Miller 337  
in the Centre for Teaching, Learning and Technology for institutional guidance and 338  
assessment criteria, and Nancy Heckman in Statistics and Michael Gold and Michael 339  
Murphy in MICB for departmental leadership and vision needed to develop and 340  
maintain the EDUCE initiative. *Funding:* This work was performed under the auspices 341  
of the UBC Teaching and Learning Enhancement Fund (TLEF), the Department of 342  
Microbiology and Immunology, and the Natural Science and Engineering Research 343  
Council (NSERC) of Canada Collaborative Research and Training Experience 344  
(CREATE) ECOSCOPE training program. *Conflict of Interest:* SJH is a co-founder of 345  
Koonkie Inc., a bioinformatics consulting company that designs and provides scalable 346  
algorithmic and data analytics solutions in the cloud. 347

## References

1. Hahn AS, Konwar KM, Louca S, Hanson NW, Hallam SJ. The information science of microbial ecology. *Current Opinion in Microbiology*. 2016;31:209–216. doi:10.1016/j.mib.2016.04.014.
2. Hey T, Tansley S, Tolle K. *The Fourth Paradigm: Data-Intensive Scientific Discovery*. Microsoft Research; 2009. Available from:

<https://www.microsoft.com/en-us/research/publication/fourth-paradigm-data-intensive-scientific-discovery/>.

3. Stephens ZD, Lee SY, Faghri F, Campbell RH, Zhai C, Efron MJ, et al. Big Data: Astronomical or Genomical? *PLOS Biology*. 2015;13(7):e1002195. doi:10.1371/journal.pbio.1002195.
4. MacLean M, Miles C. Swift action needed to close the skills gap in bioinformatics. *Nature*. 1999;401(6748):10–10. doi:10.1038/43269.
5. Attwood TK, Blackford S, Brazas MD, Davies A, Schneider MV. A global perspective on evolving bioinformatics and data science training needs. *Briefings in Bioinformatics*. 2017;20(2):398–404. doi:10.1093/bib/bbx100.
6. Horton NJ, Hardin JS. Teaching the Next Generation of Statistics Students to “Think With Data”: Special Issue on Statistics and the Undergraduate Curriculum. *The American Statistician*. 2015;69(4):259–265. doi:10.1080/00031305.2015.1094283.
7. Hamrick K. Women, Minorities, and Persons with Disabilities in Science and Engineering: 2019. Alexandria, VA: National Science Foundation: National Center for Science and Engineering Statistics; 2019. Special Report NSF 19-304. Available from: <https://www.nsf.gov/statistics/wmpd>.
8. Howlett J. *Progressive Education: A Critical Introduction*. Bloomsbury Publishing; 2013.
9. Freeman S, Eddy SL, McDonough M, Smith MK, Okoroafor N, Jordt H, et al. Active learning increases student performance in science, engineering, and mathematics. *Proceedings of the National Academy of Sciences*. 2014;111(23):8410–8415. doi:10.1073/pnas.1319030111.
10. Williams JJ, Teal TK. A vision for collaborative training infrastructure for bioinformatics. *Annals of the New York Academy of Sciences*. 2017;1387(1):54–60. doi:10.1111/nyas.13207.
11. Wenger E, McDermott R, Snyder W. *Cultivating Communities of Practice: A Guide to Managing Knowledge*. USA: Harvard Business School Press; 2002.

12. Vygotsky LS. *Mind in Society: Development of Higher Psychological Processes*. Harvard University Press; 1980.
13. R Core Team. *R: A language and environment for statistical computing*; 2019. Available from: <http://www.r-project.org/>.
14. Bransford JD, Brown AL, Cocking RR. *How People Learn: Brain, Mind, Experience, and School*. Washington D.C.: National Academy Press; 2000.
15. Morris CD, Bransford JD, Franks JJ. Levels of processing versus transfer appropriate processing. *Journal of Verbal Learning and Verbal Behavior*. 1977;16(5):519–533. doi:10.1016/s0022-5371(77)80016-9.
16. Phanstiel DH. *Sushi: Tools for visualizing genomics data*; 2018.
17. Hawley AK, Torres-Beltrán M, Zaikova E, Walsh DA, Mueller A, Scofield M, et al. A compendium of multi-omic sequence information from the Saanich Inlet water column. *Scientific Data*. 2017;4(1):170160. doi:10.1038/sdata.2017.160.
18. National Academies of Sciences, Medicine, Engineering. *Data Science for Undergraduates: Opportunities and Options*. Washington, DC: The National Academies Press; 2018. Available from: <https://www.nap.edu/catalog/25104/data-science-for-undergraduates-opportunities-and-options>.
19. Farrell KJ, Carey CC. Power, pitfalls, and potential for integrating computational literacy into undergraduate ecology courses. *Ecology and Evolution*. 2018;8(16):7744–7751. doi:10.1002/ece3.4363.
20. Feldon DF, Jeong S, Peugh J, Roksa J, Maahs-Fladung C, Shenoy A, et al. Null effects of boot camps and short-format training for PhD students in life sciences. *Proceedings of the National Academy of Sciences*. 2017;114(37):9854–9858. doi:10.1073/pnas.1705783114.
21. Budé L, Imbos T, Wiel MWvd, Berger MP. The effect of distributed practice on students' conceptual understanding of statistics. *Higher Education*. 2011;62(1):69–79. doi:10.1007/s10734-010-9366-y.

22. Fox J, Weisberg S. An R Companion to Applied Regression. 3rd ed. Thousand Oaks CA: Sage; 2019. Available from:  
<https://socialsciences.mcmaster.ca/jfox/Books/Companion/>.
23. Torres-Beltrán M, Hawley AK, Capelle D, Zaikova E, Walsh DA, Mueller A, et al. A compendium of geochemical information from the Saanich Inlet water column. *Scientific Data*. 2017;4(1):170159. doi:10.1038/sdata.2017.159.
24. Jones F, Harris S. Benefits and Drawbacks of Using Multiple Instructors to Teach Single Courses. *College Teaching*. 2012;60(4):132–139.  
doi:10.1080/87567555.2012.654832.
25. Bess JL. *Teaching Alone, Teaching Together : Transforming the Structure of Teams for Teaching*. 1st ed. San Francisco, USA: Jossey-Bass; 2000.
